# Supplementary material for: Constructing built-in electric fields in 2D/2D Schottky heterojunctions for efficient alkaline seawater electrolysis
Source: Royal Society of Chemistry journal article supplement (doi:10.1039/d4qi01587h), 2024-01-01
Supplement: d4qi01587h1.pdf [file d4qi01587h1.pdf]

## Supporting Information

### Constructing built-in electric field in 2D/2D Schottky heterojunction for efficient alkaline seawater electrolysis

Hongjun Chen,<sup>a</sup> Liming Deng,<sup>a</sup> Sheng Zhao,<sup>a</sup> Shuyi Liu,<sup>a</sup> Feng Hu,<sup>\*a</sup> Linlin Li,<sup>\*a</sup>  
Jianwei Ren<sup>b</sup> and Shengjie Peng<sup>\*ac</sup>

<sup>a</sup> College of Materials Science and Technology, Nanjing University of Aeronautics and Astronautics, Nanjing 210016, China

E-mail: fenghu@nuaa.edu.cn (Feng Hu), lilinlin@nuaa.edu.cn (Linlin Li), pengshengjie@nuaa.edu.cn (Shengjie Peng)

<sup>b</sup> Department of Mechanical Engineering Science, University of Johannesburg, 2092 Johannesburg, South Africa

<sup>c</sup> State Key Laboratory of High Performance Ceramics and Superfine Microstructure

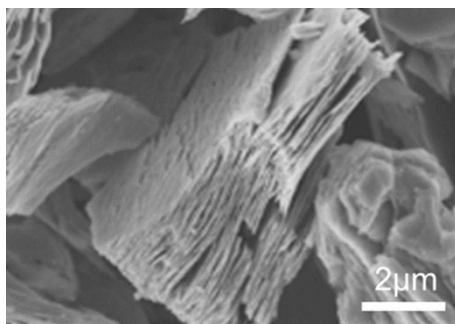

**Fig. S1.** SEM image of multilayer MXene.

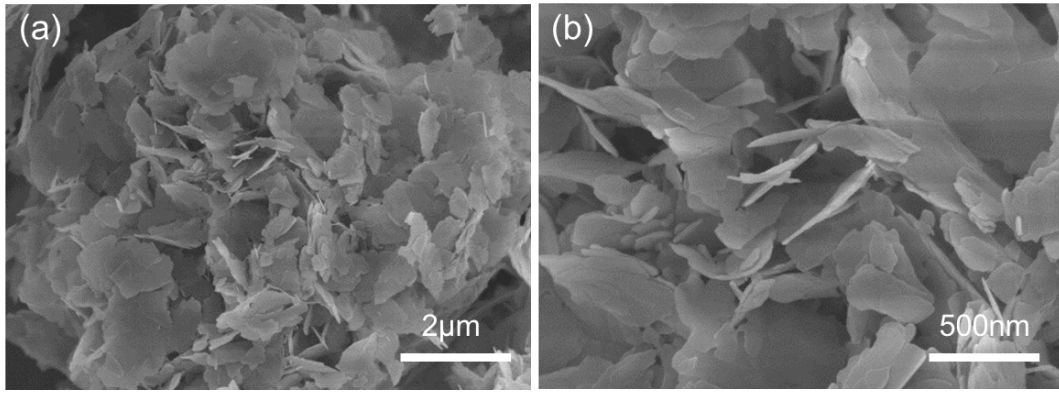

**Fig. S2.** (a) High-power; (b) low-power SEM images of  $\text{Co}_3(\text{PO}_4)_2$ .

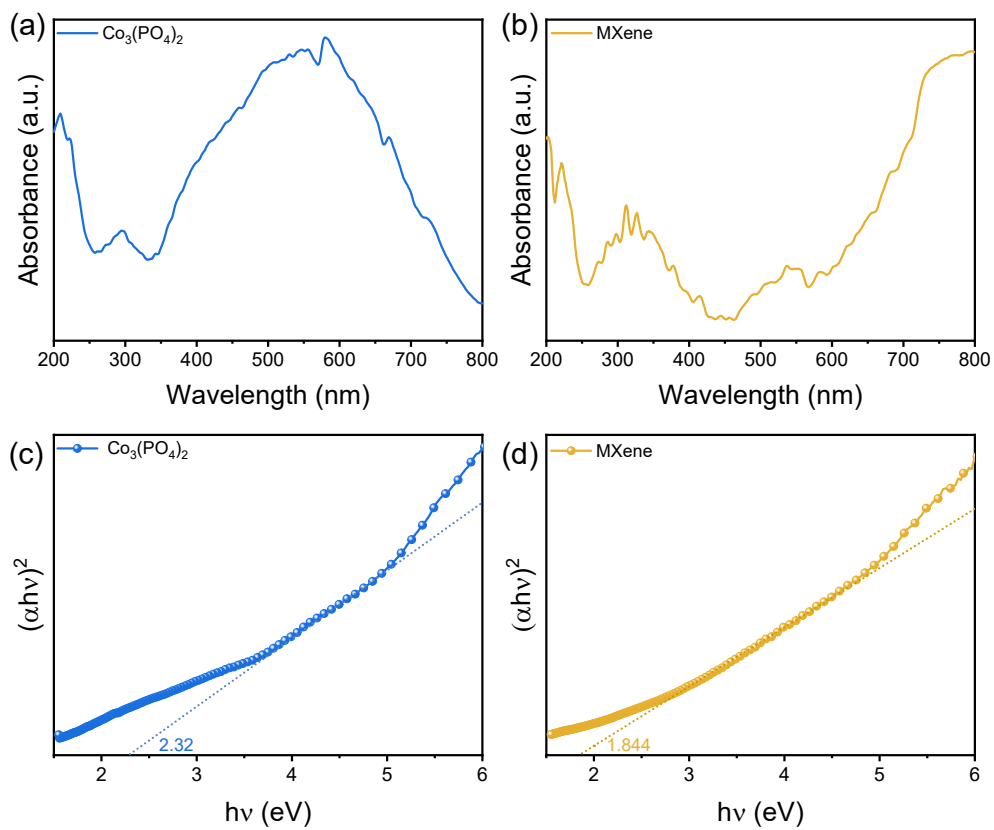

**Fig. S3.** Tauc plots converted from UV-vis diffuse reflection spectra of  $\text{Co}_3(\text{PO}_4)_2$  and MXene.

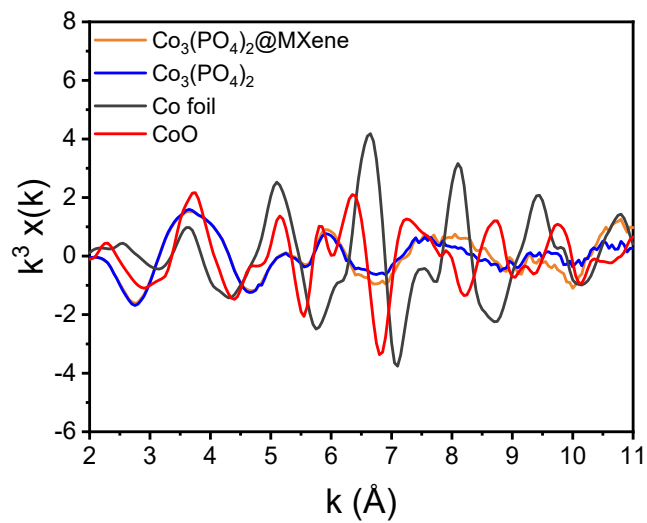

**Fig. S4.** Co K-edge EXAFS oscillation function of Co foil, CoO,  $\text{Co}_3(\text{PO}_4)_2$  and  $\text{Co}_3(\text{PO}_4)_2@MXene$ .

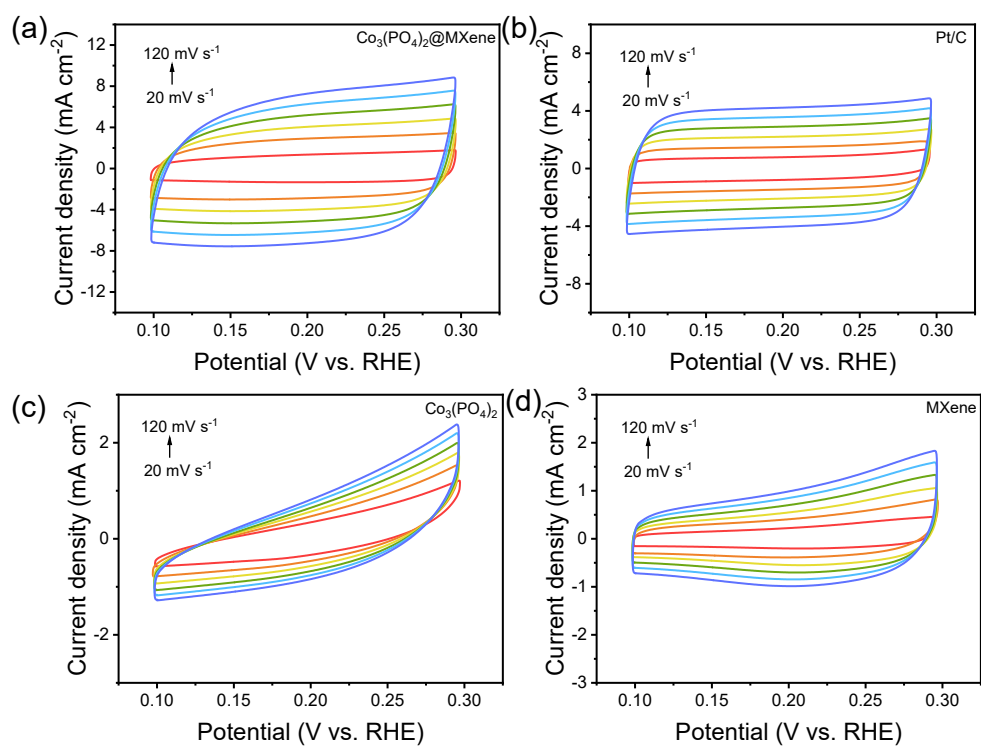

**Fig. S5.** Cyclic voltammetry of (a)  $\text{Co}_3(\text{PO}_4)_2@\text{MXene}$ , (b) Pt/C, (c)  $\text{Co}_3(\text{PO}_4)_2$ , and (d) MXene at different scanning rates (20, 40, 60, 80, 100, and  $120 \text{ mV s}^{-1}$ ) in the range of 0.1~0.3 V vs. RHE potentials, used to estimate double layer capacitance ( $C_{dl}$ ).

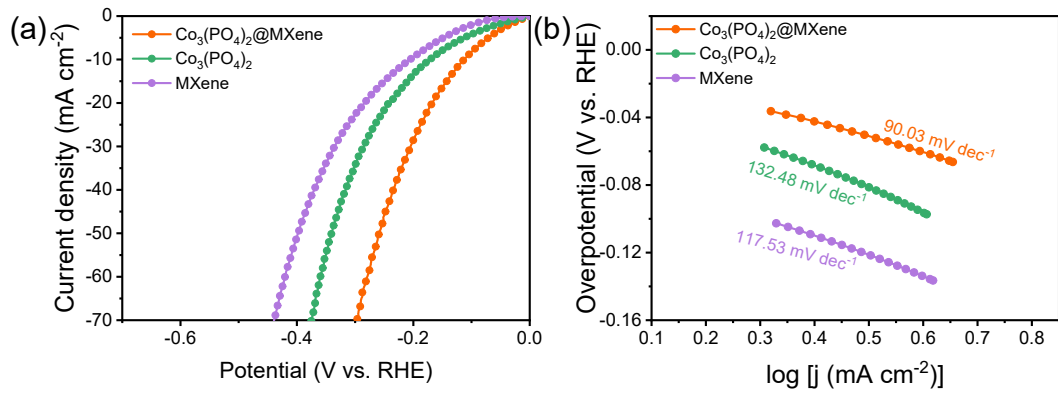

**Fig. S6.** (a) LSV polarization diagram, (b) Tafel slope diagram of  $\text{Co}_3(\text{PO}_4)_2$ , MXene and  $\text{Co}_3(\text{PO}_4)_2$ @MXene in seawater electrolyte.

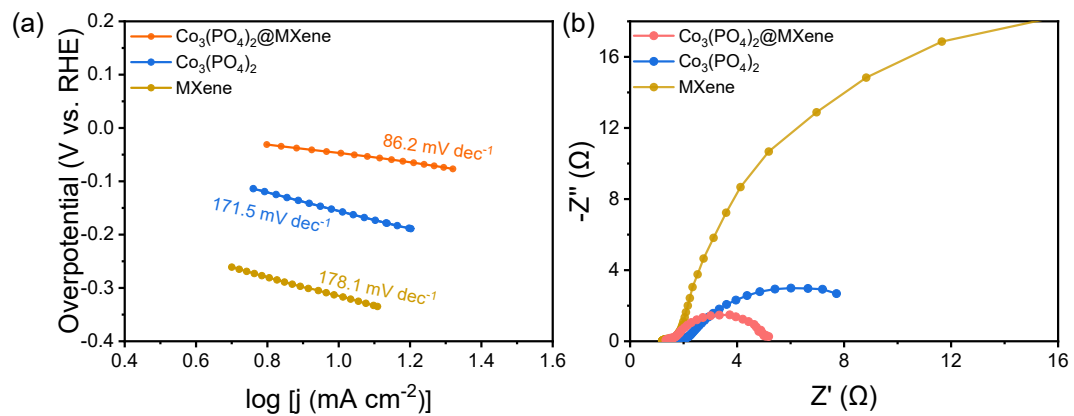

**Fig. S7.** (a) Tafel slope diagram, (b) EIS curves of Co<sub>3</sub>(PO<sub>4</sub>)<sub>2</sub>, MXene and Co<sub>3</sub>(PO<sub>4</sub>)<sub>2</sub>@MXene in alkaline seawater.



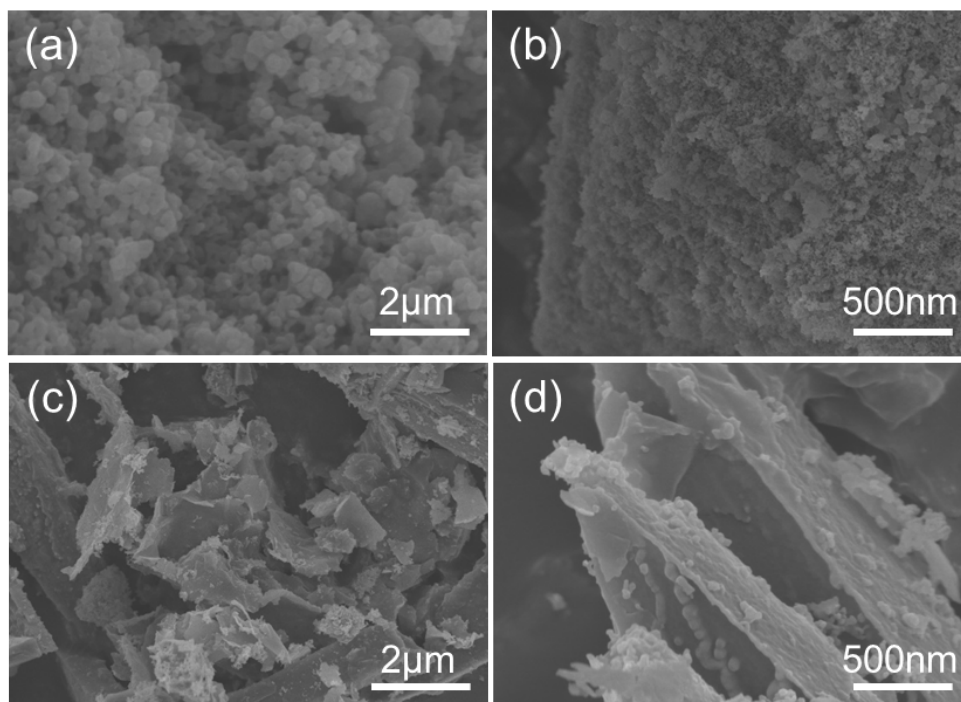

**Fig. S8.** (a) High-power and (b) low-power SEM images of  $\text{Fe}_3(\text{PO}_4)_2$ . (c) High-power and (d) low-power SEM images of  $\text{Fe}_3(\text{PO}_4)_2@MXene$ .

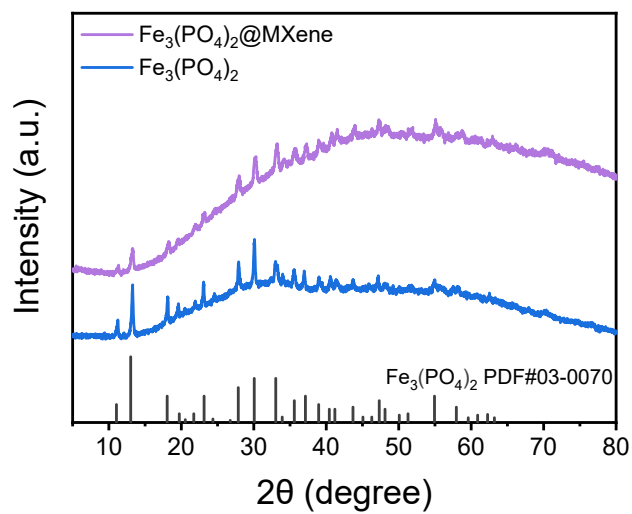

**Fig. S9.** XRD pattern of Fe<sub>3</sub>(PO<sub>4</sub>)<sub>2</sub> and Fe<sub>3</sub>(PO<sub>4</sub>)<sub>2</sub>@MXene.

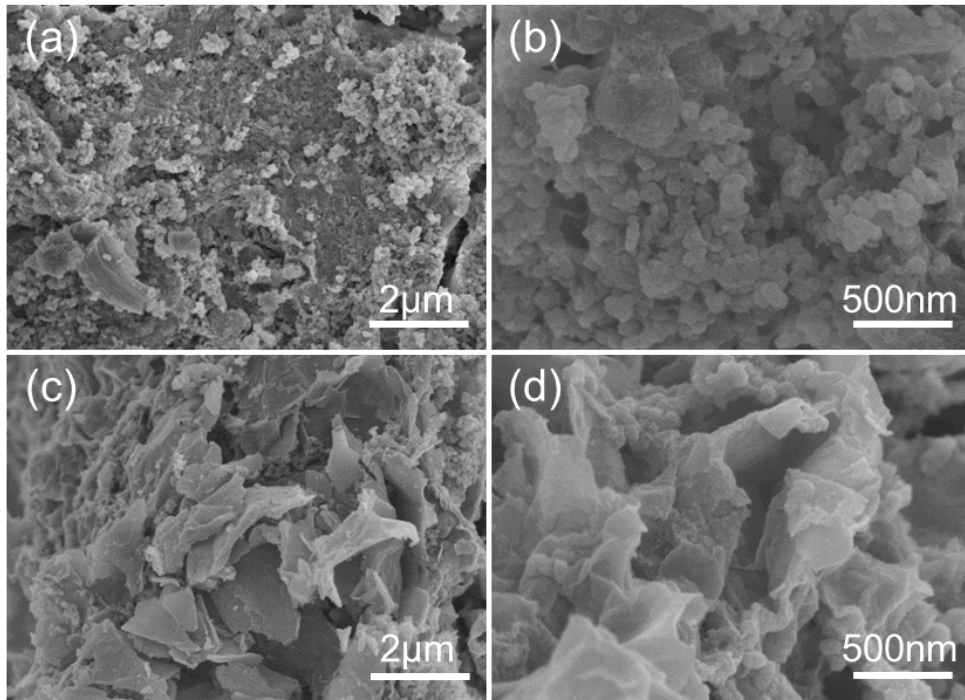

**Fig. S10.** (a) High-power and (b) low-power SEM images of Ni<sub>3</sub>(PO<sub>4</sub>)<sub>2</sub>. (c) High-power and (d) low-power SEM images of Ni<sub>3</sub>(PO<sub>4</sub>)<sub>2</sub>@MXene.

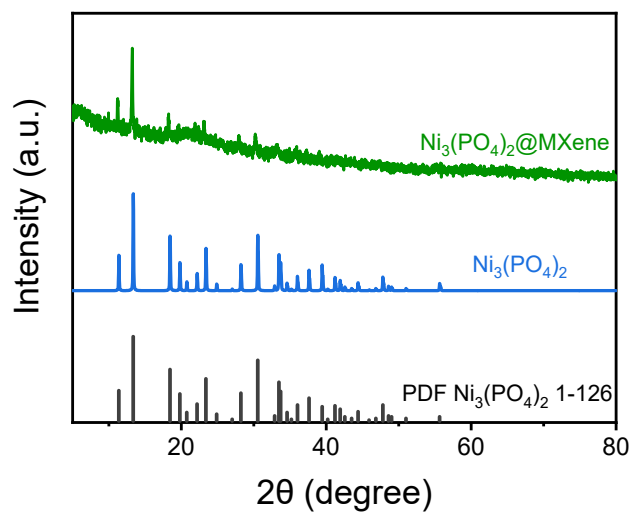

**Fig. S11.** XRD pattern of Ni<sub>3</sub>(PO<sub>4</sub>)<sub>2</sub> and Ni<sub>3</sub>(PO<sub>4</sub>)<sub>2</sub>@MXene.

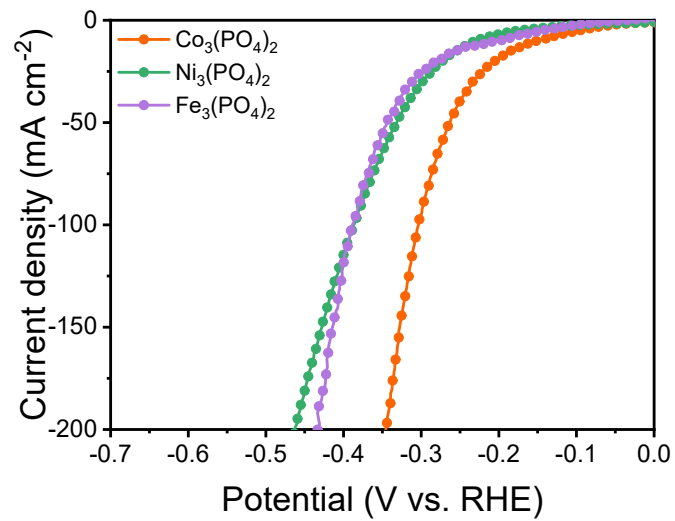

**Fig. S12.** LSV polarization curve of in of  $\text{M}_3(\text{PO}_4)_2$  ( $\text{M} = \text{Ni}, \text{Co}, \text{Fe}$ ) in 1 M KOH electrolyte.

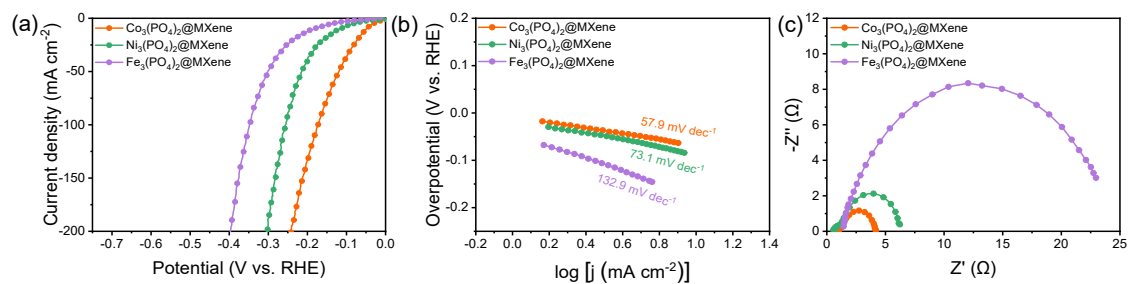

**Fig. S13.** (a) LSV polarization curve, (b) Tafel slope diagram, and (c) EIS curves of in of  $M_3(\text{PO}_4)_2@MXene$  ( $M = \text{Ni}, \text{Co}, \text{Fe}$ ) in 1 M KOH electrolyte.

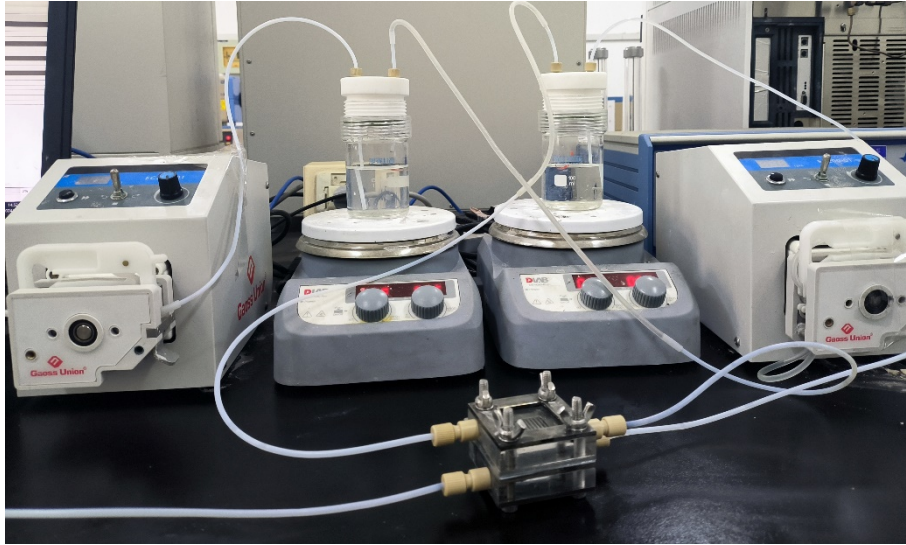

**Fig. S14.** The two-electrode AEM water electrolyzer.

**Table S1.** A comparison of HER activity measured for  $\text{Co}_3(\text{PO}_4)_2@\text{MXene}$  with other representative cobalt-based catalysts reported that HER catalysts used 1 M KOH as an electrolyte.

| Catalyst                                  | Overpotential<br>(mV)<br>@10 mA cm <sup>-2</sup> | Stability (h)                                                                                | References                                 |
|-------------------------------------------|--------------------------------------------------|----------------------------------------------------------------------------------------------|--------------------------------------------|
| $\text{Co}_3(\text{PO}_4)_2@\text{MXene}$ | 48                                               | 100@10 mA cm <sup>-2</sup><br>(1 M KOH)<br>165@500 mA cm <sup>-2</sup><br>(1 M KOH seawater) | This work                                  |
| RuCo-CAT/CC                               | 38                                               | 15@10 mA cm <sup>-2</sup>                                                                    | Adv. Funct. Mater.<br>2023, 13, 2204177.   |
| Pt@CoN <sub>4</sub> -G                    | 39                                               | 12@10 mA cm <sup>-2</sup>                                                                    | Adv. Funct. Mater.<br>2023, 33, 2303189.   |
| NiCoVP                                    | 42                                               | 30@10 mA cm <sup>-2</sup>                                                                    | J. Mater. Chem. A<br>2021, 9, 12203-12213. |
| Fe@Co <sub>9</sub> S <sub>8</sub> -hcp    | 44.1                                             | 20@600 mA cm <sup>-2</sup>                                                                   | Adv. Funct. Mater.<br>2023, 33, 2210298.   |
| NiCoP-WO <sub>x</sub>                     | 49                                               | 60@10 mA cm <sup>-2</sup>                                                                    | J. Mater. Chem. A<br>2021, 9, 10909-10920. |
| CuCo-CAT                                  | 52                                               | 10@10 mA cm <sup>-2</sup>                                                                    | Adv. Mater. 2021, 33,<br>2106781.          |
| CoNiRu-NT <sub>3</sub>                    | 52                                               | 48@10 mA cm <sup>-2</sup>                                                                    | Adv. Mater. 2022, 34,<br>2107488.          |
| CoF <sub>2</sub>                          | 54                                               | 110@10 mA cm <sup>-2</sup>                                                                   | Adv. Sci. 2022, 9,<br>2103567.             |
| CoMo <sub>2</sub> S <sub>4</sub>          | 55                                               | 24@100 mA cm <sup>-2</sup>                                                                   | Adv. Funct. Mater.<br>2021, 31, 2103732.   |



---

|                                              |      |                             |                                              |
|----------------------------------------------|------|-----------------------------|----------------------------------------------|
| $\text{Co}_{3-x}\text{Ni}_x\text{O}_4$       | 57   | $300@20 \text{ mA cm}^{-2}$ | ACS Catal. 2021, 11, 8174-8182.              |
| $\text{NiCoRu}_{0.2}/\text{SP}$              | 59   | $100@10 \text{ mA cm}^{-2}$ | Appl. Catal. B Environ. 2023, 331, 122710.   |
| 10:MoCo-VS <sub>2</sub> /CC                  | 63   | $36@10 \text{ mA cm}^{-2}$  | J. Mater. Chem. A 2022, 10, 9067-9079.       |
| V-SRCo                                       | 72.3 | $57@10 \text{ mA cm}^{-2}$  | Adv. Energy Mater. 2023, 13, 2301779.        |
| $\text{CoTe}_2/\text{CoP}$                   | 80   | $20@100 \text{ mA cm}^{-2}$ | Appl. Catal. B Environ. 2023, 329, 122551.   |
| Ce-CoP@CC                                    | 81   | $25@10 \text{ mA cm}^{-2}$  | Adv. Energy Mater. 2023, 13, 30.             |
| $\text{NiCo}_2\text{S}_4/\text{ReS}_2$       | 85   | $15@10 \text{ mA cm}^{-2}$  | Adv. Funct. Mater. 2022, 33, 2210072.        |
| 1T Co-WS <sub>2</sub> /NiTe <sub>2</sub> /Ni | 88   | $24@50 \text{ mA cm}^{-2}$  | Nano Energy 2022, 102, 107712.               |
| $\text{Co}_{0.5}\text{W}_{0.5}\text{S}_x$    | 110  | $10@10 \text{ mA cm}^{-2}$  | J. Mater. Chem. A. 2021, 9, 11359-11369.     |
| Fe-Co-Ni MOF                                 | 116  | $48@10 \text{ mA cm}^{-2}$  | J. Am. Chem. Soc. 2022, 144, 3411-3428.      |
| Mo-Co <sub>0.85</sub> SeVSe/NC               | 151  | $12@100 \text{ mA cm}^{-2}$ | Adv. Funct. Mater. 2021, 32, 2109556.        |
| $\text{CoP}_x/\text{CNS}$                    | 171  | $60@16 \text{ mA cm}^{-2}$  | Angew. Chem. Int. Ed. 2020, 59, 21360-21366. |

---

**Table S2.** Comparison of catalytic performance for alkaline seawater electrolysis

| Catalyst                                                                            | Potential (V)                                                                               | Stability (h)                                                      | References                                 |
|-------------------------------------------------------------------------------------|---------------------------------------------------------------------------------------------|--------------------------------------------------------------------|--------------------------------------------|
| Co <sub>3</sub> (PO <sub>4</sub> ) <sub>2</sub> @MXene    NiFe LDH                  | 1.81@100 mA cm <sup>-2</sup><br>2.01@500 mA cm <sup>-2</sup>                                | 165<br>@500 mA cm <sup>-2</sup>                                    | This work                                  |
| CoFe-Ni <sub>2</sub> P/Ni-felt   <br>CoFe-Ni <sub>2</sub> P/Ni-felt                 | 1.738@100 mA cm <sup>-2</sup><br>1.891@500 mA cm <sup>-2</sup>                              | 100<br>@500 mA cm <sup>-2</sup>                                    | Adv. Energy Mater. 2023, 13, 2301475.      |
| Cr-Co <sub>x</sub> P    Cr-Co <sub>x</sub> P                                        | 1.54@10 mA cm <sup>-2</sup><br>1.85@100 mA cm <sup>-2</sup><br>2.01@200 mA cm <sup>-2</sup> | 16<br>@100 mA cm <sup>-2</sup>                                     | Adv. Funct. Mater. 2023, 33, 2214081.      |
| CoP <sub>x</sub>    CoP <sub>x</sub> @FeOOH                                         | 1.71V@100 mA cm <sup>-2</sup><br>1.867@500 mA cm <sup>-2</sup>                              | 80<br>@500 mA cm <sup>-2</sup>                                     | Appl. Catal. B Environ. 2021, 294, 120256. |
| Ni <sub>2</sub> P-Fe <sub>2</sub> P/NF   <br>Ni <sub>2</sub> P-Fe <sub>2</sub> P/NF | 1.811@100 mA cm <sup>-2</sup><br>2.004@500 mA cm <sup>-2</sup>                              | 48<br>@100 mA cm <sup>-2</sup><br>38<br>@500 mA cm <sup>-2</sup>   | Adv. Funct. Mater. 2020, 31, 2006484.      |
| BDD  <br>Cu <sub>2</sub> S@NiS@Ni/NiMo                                              | 1.68@100 mA cm <sup>-2</sup><br>1.82@500 mA cm <sup>-2</sup>                                | 2000<br>@500 mA cm <sup>-2</sup>                                   | Adv. Energy Mater. 2023, 33, 2302263.      |
| NiMoN   <br>S-(Ni,Fe)OOH                                                            | 1.661@100 mA cm <sup>-2</sup><br>1.837@500 mA cm <sup>-2</sup>                              | 100<br>@100 mA cm <sup>-2</sup><br>100<br>@500 mA cm <sup>-2</sup> | Energy Environ. Sci. 2020, 13, 3439-3446.  |
| N-CDs/NiFe   <br>LDH/NF                                                             | 1.56@100 mA cm <sup>-2</sup>                                                                | 20<br>@10 mA cm <sup>-2</sup>                                      | Nano Res. 2022, 15, 7063-7070.             |

**Table S3.** Comparison of catalytic performance for alkaline water/seawater electrolysis in  $\text{Co}_3(\text{PO}_4)_2@\text{MXene} \parallel \text{NiFe LDH}$  electrolyzer.

| Catalyst                                                                                 | Potential (V)                                                                                       | Stability (h)                                                      | References                            |
|------------------------------------------------------------------------------------------|-----------------------------------------------------------------------------------------------------|--------------------------------------------------------------------|---------------------------------------|
| $\text{Co}_3(\text{PO}_4)_2@\text{MXene} \parallel \text{NiFe LDH}$                      | 1.71@500 mA cm <sup>-2</sup><br>2.0@1000 mA cm <sup>-2</sup>                                        | 50<br>@500 mA cm <sup>-2</sup>                                     | This work                             |
| $\text{CoFe-Ni}_2\text{P/Ni-felt} \parallel \text{CoFe-Ni}_2\text{P/Ni-felt}$            | 2.25@1 A cm <sup>-2</sup><br>2.79@3 A cm <sup>-2</sup><br>(6 M KOH seawater)                        | 350<br>@1 A cm <sup>-2</sup>                                       | Adv. Energy Mater. 2023, 13, 2301475. |
| $\text{NiFe}@\text{DG} \parallel \text{Pt/C}$                                            | 1.496@10 mA cm <sup>-2</sup><br>1.602@100 mA cm <sup>-2</sup><br>(1 M KOH seawater)                 | 1000<br>@10 mA cm <sup>-2</sup>                                    | ACS Nano 2023, 17, 18372-18381.       |
| $\text{Ni-MoN} \parallel \text{SSM}$                                                     | 1.635@100 mA cm <sup>-2</sup><br>1.783@500 mA cm <sup>-2</sup><br>(1 M KOH seawater)                | 100<br>@100 mA cm <sup>-2</sup><br>100<br>@500 mA cm <sup>-2</sup> | Adv. Mater 2022, 34, 2201774.         |
| $\text{NiMoN} \parallel \text{NiMoN}@\text{NiFeN}$                                       | 1.613@100mA cm <sup>-2</sup><br>1.7@500 mA cm <sup>-2</sup><br>(1 M KOH)                            | /                                                                  |                                       |
| $\text{NiMoN} \parallel \text{NiMoN}@\text{NiFeN}$                                       | 1.581@100 mA cm <sup>-2</sup><br>1.77@500 mA cm <sup>-2</sup><br>(1 M KOH seawater)                 | 100<br>@100 mA cm <sup>-2</sup><br>100<br>@500 mA cm <sup>-2</sup> | Nat. Commun. 2019, 10, 5106.          |
| $\text{NiP}_2\text{-FeP}_2/\text{Cu}_{\text{NW}}/\text{CF} \parallel \text{NiFe-LDH/NF}$ | 1.76@100 mA cm <sup>-2</sup><br>(1 M KOH)<br>1.93@100 mA cm <sup>-2</sup><br>(1 M KOH + 0.6 M NaCl) | /                                                                  | ACS Energy Lett. 2021, 6, 354.        |
